# Supplementary figures and images for: Coronal-splitting Reduction Genioplasty Combined with Bilateral Osteotomies of the Mandibular Inferior Border for Macrogenia
Source: PubMed Central journal article supplement — Plast Reconstr Surg Glob Open. 2024 Apr 8;12(4):e5725. doi: 10.1097/GOX.0000000000005725 (PMC11000777; doi:10.1097/gox.0000000000005725), 2024-04-08

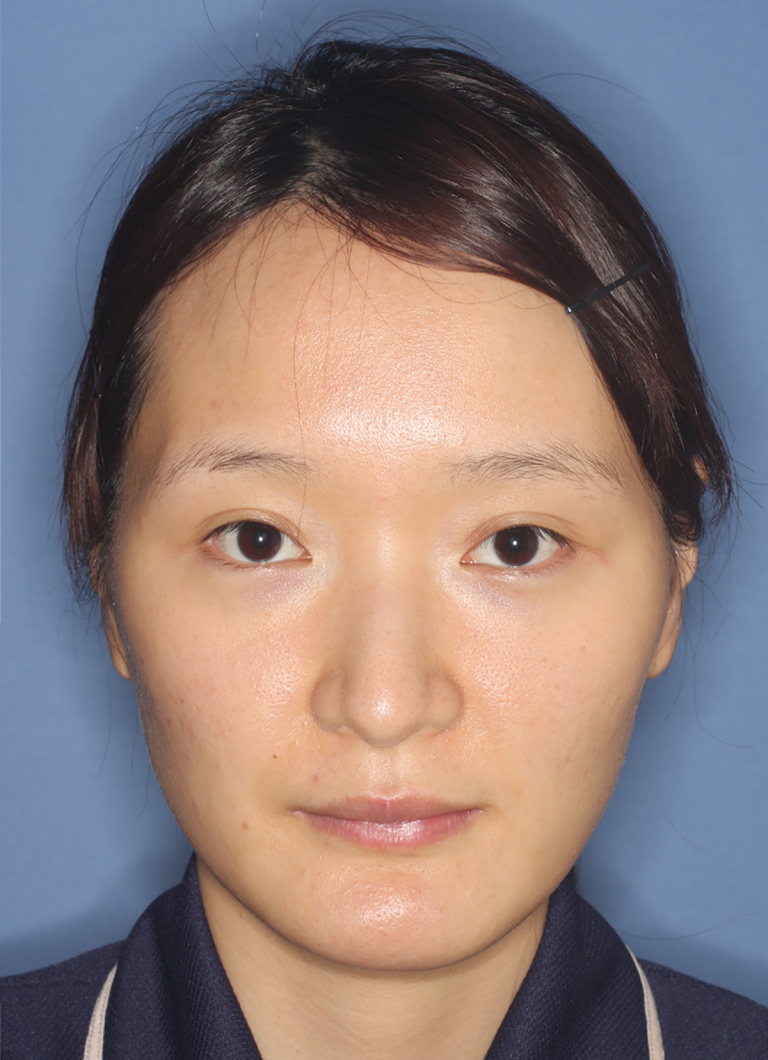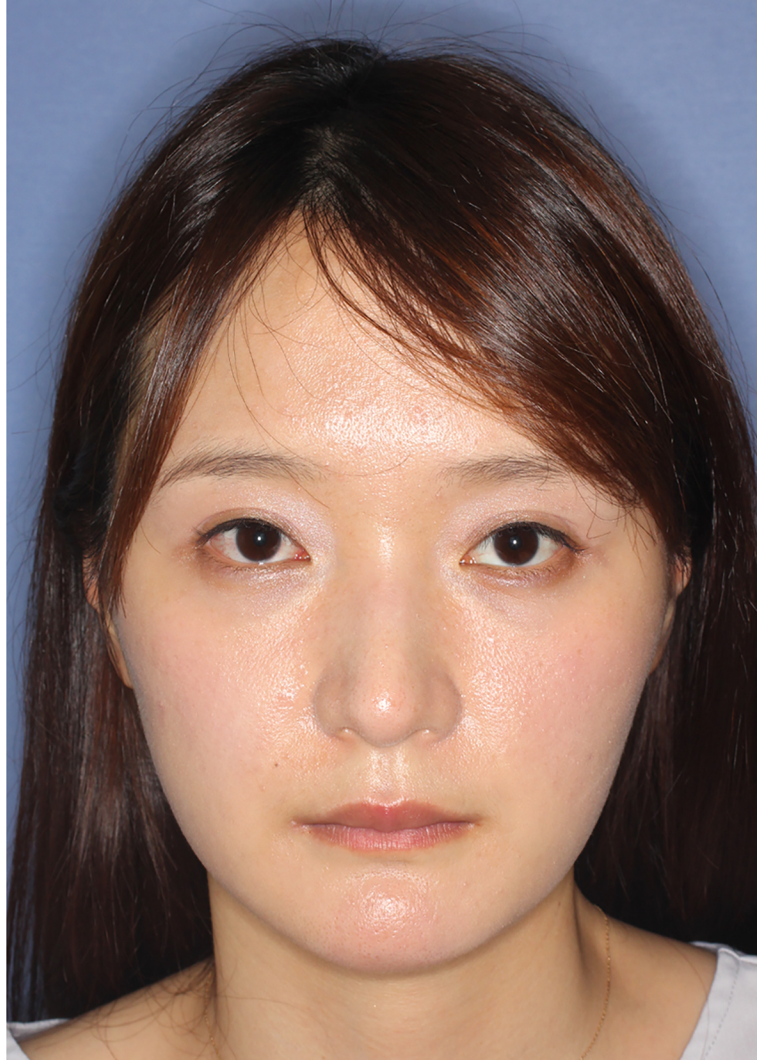

Supplement: gox-12-e5725-s002.pdf [file gox-12-e5725-s002.pdf]
